# Supplementary material
Source: Springer Nature journal article supplement (https://www.springermedizin.de/resource/supplementary/12885_2012_3246_MOESM1_ESM.pdf/9462840)
Supplement: MOESM1 [file 9462840]

**RANDOMISE**

```
graph TD; A{RANDOMISE} --> B[OPEN SURGERY]; A --> C[LAPAROSCOPIC SURGERY]; B --> D[ENHANCED RECOVERY PROGRAMME]; C --> D;
```

**OPEN  
SURGERY**

**LAPAROSCOPIC  
SURGERY**

**ENHANCED RECOVERY PROGRAMME**
